# Supplementary material for: Spectroscopic and photophysical study of the demetallation of a zinc porphyrin and the aggregation of its free base in a tetraalkylphosphonium ionic liquid
Source: Royal Society of Chemistry journal article supplement (doi:10.1039/c4cp04257c), 2014-01-01

## Spectroscopic and Photophysical Study of the Demetallation of a Zinc Porphyrin and the Aggregation of its Free Base in a Tetraalkylphosphonium Ionic Liquid

Neeraj K. Giri, Abhinandan Banerjee, Robert W. J. Scott, Matthew F. Paige,\* and Ronald P. Steer\*

### Supporting Information

#### 1. Purification of the ionic liquid

A 25 mL aliquot of the ionic liquid was dissolved in 50 mL of dichloromethane and *ca.* 1g activated charcoal added. The mixture was stirred overnight and filtered to recover a clear solution of the ionic liquid in dichloromethane. A specially prepared column, similar to the ones used by Earle, *et al.*<sup>1</sup> for alkylimidazolium ionic liquid purification, was then used for the subsequent purification steps. The column itself was an ordinary one used in conventional chromatography, with a 24/40 female joint on top. It contained Celite on the bottom, flash chromatographic silica gel in the middle, and alumina on top; it was expected that passage through this column would remove all charged contaminants from the ionic liquid solution.

The column was subjected to a pretreatment step with *ca.* 100 mL dichloromethane prior to its use. Then the filtrate from the previous step was passed through the column, and finally, another 50 mL dichloromethane was used to elute the remainder of the ionic liquid. A Schlenk adapter was used in order to create a higher superincumbent pressure of gaseous nitrogen over the column, which accelerated the rate of flow of the liquid through the column.

Once eluted, the neat ionic liquid was obtained from the eluate by heating it at 55°C in vacuo. <sup>1</sup>H NMR spectroscopy of the purified ionic liquid in CDCl<sub>3</sub> failed to suggest the presence of any impurities (*cf.* Figure S1, below).

1. Earle, M. J.; Gordon, C. M.; Plechkova, N. V.; Seddon, K. R.; Welton, T., *Anal. Chem.* **2007**, *79*, 758–764.

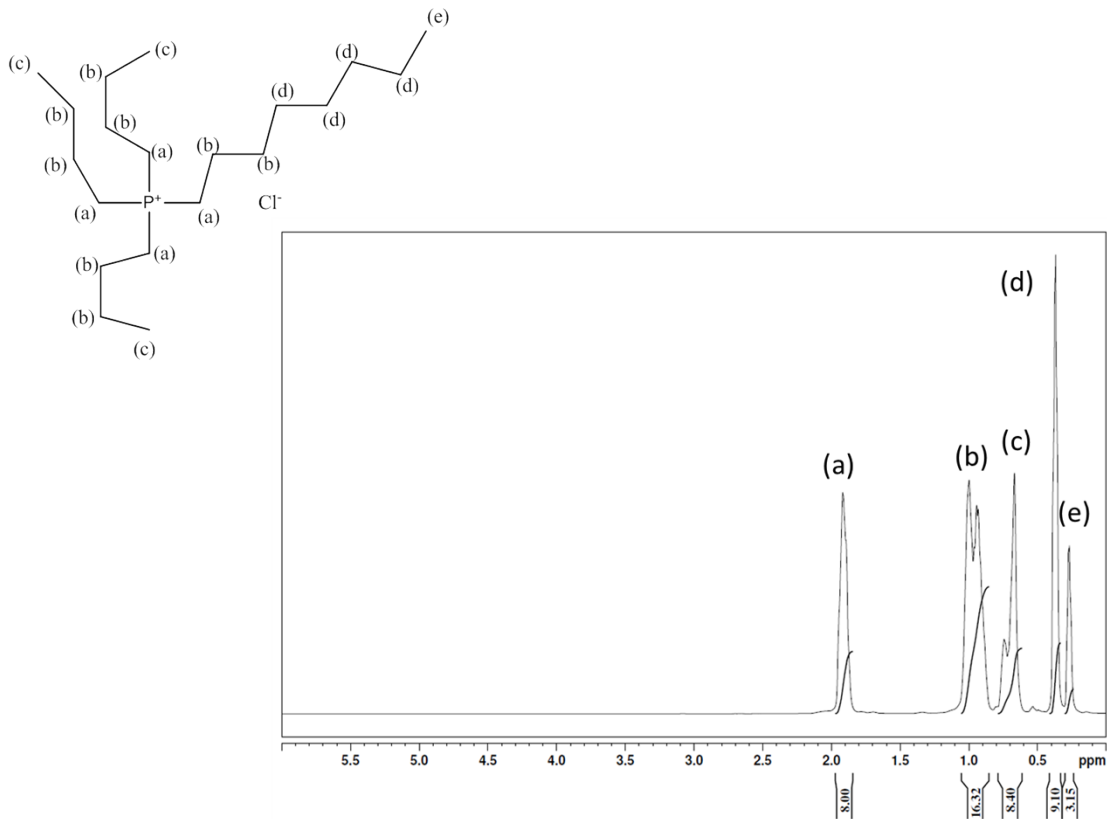

**Figure S1:**  $^1\text{H}$  NMR spectrum of the P4448Cl ionic liquid in  $\text{CDCl}_3$ .

**2. Derivation of the relationships between modelled Gaussian areas of the absorption spectra on a  $\text{cm}^{-1}$  ( $\bar{\nu}$ ) scale, the concentrations of the species present in the system and the thermodynamics of the aggregation equilibrium.**

Mass balance:  $[M] + 2[J] = \text{constant}$  for only dimeric aggregates

At equilibrium:  $2 M \rightleftharpoons J$  ;  $K_{\text{eq}} = [J]/[M]^2$ , using activity = molar concentration

From the Beer-Lambert Law: Absorbance( $\bar{\nu}$ )  $\propto \epsilon(\bar{\nu})c$ , where c is the molar conc.

$$A = \text{Area of Gaussian} \propto \int \text{Absorbance}(\bar{\nu}) \propto c \int \epsilon(\bar{\nu})$$

$$\int \epsilon(\bar{\nu}) \propto f, \text{ the oscillator strength of the transition}$$

$$A/f \propto \text{concentration}; \quad A_M/f_M \propto [M] \quad \text{and} \quad A_J/f_J \propto [J]$$

So, using a common proportionality constant, C:

$$CA_M/f_M = [M] \quad \text{and} \quad CA_J/f_J = [J]$$

$$K_{eq} = [J]/[M]^2 = (CA_J/f_J)/(CA_M/f_M)^2 = \{f_M^2/(Cf_J)\}\{A_J/(A_M)^2\}$$

$$f_J = \beta f_M \quad \text{where } 2.0 \leq \beta = f_J/f_M \leq 1.0 \text{ if } n = 2$$

$$A_J/(A_M)^2 = \{Cf_J/(f_M)^2\}K_{eq} = (K_{eq})\{C\beta/f_M\}$$

Van't Hoff equation:  $\ln\{K_{eq}\} = -\Delta G^\circ/(RT)$  and  $d\{\ln(K_{eq})\}/d\{1/T\} = -\Delta H^\circ/R$

$$\ln\{A_J/(A_M)^2\} = \ln\{K_{eq}\} + \ln\{C\beta/f_M\}$$

If  $(C\beta/f_M) \neq f(T)$ , then the slope of a graph of  $\ln\{A_J/(A_M)^2\}$  vs.  $1/T$  will give a slope  $= -\Delta H^\circ/R$ , from which  $\Delta H^\circ$  for the equilibrium reaction can be obtained.

Mass Balance:  $2[J] + [M] = \text{constant}$  at all temperatures (if only dimerization)

$$2CA_J/f_J + CA_M/f_M = \text{constant} \quad \text{at all temperatures}$$

$$(2f_M/f_J)A_J + A_M = (\text{constant})(f_M/C) = \text{constant}'$$

$$2A_J/\beta + A_M = \text{constant}'$$

Do trials for allowed values of  $\beta$ :  $2.0 \leq \beta = f_J/f_M \leq 1.0$  (*cf.* Table S1). Use A1 for  $A_J$  and the sum of A3+A4+A5 ( $B(0,0) + B(1,1) + B(1,0)$ ) for  $A_M$ . The best fit is for  $\beta \sim 2$ , suggesting that the J dimers are primarily in a side-by-side arrangement.

### 3. Modelling of absorption spectra (on a $\text{cm}^{-1}$ scale) by a sum of Gaussian features; $x_i$ are the peak wavenumbers, $w_i$ are the FWHM, $A_i$ are the areas

#### a. $2.5 \mu\text{M}$ $\text{H}_2\text{TPP}$ in IL; the Soret region, Figure S2 and Table S1

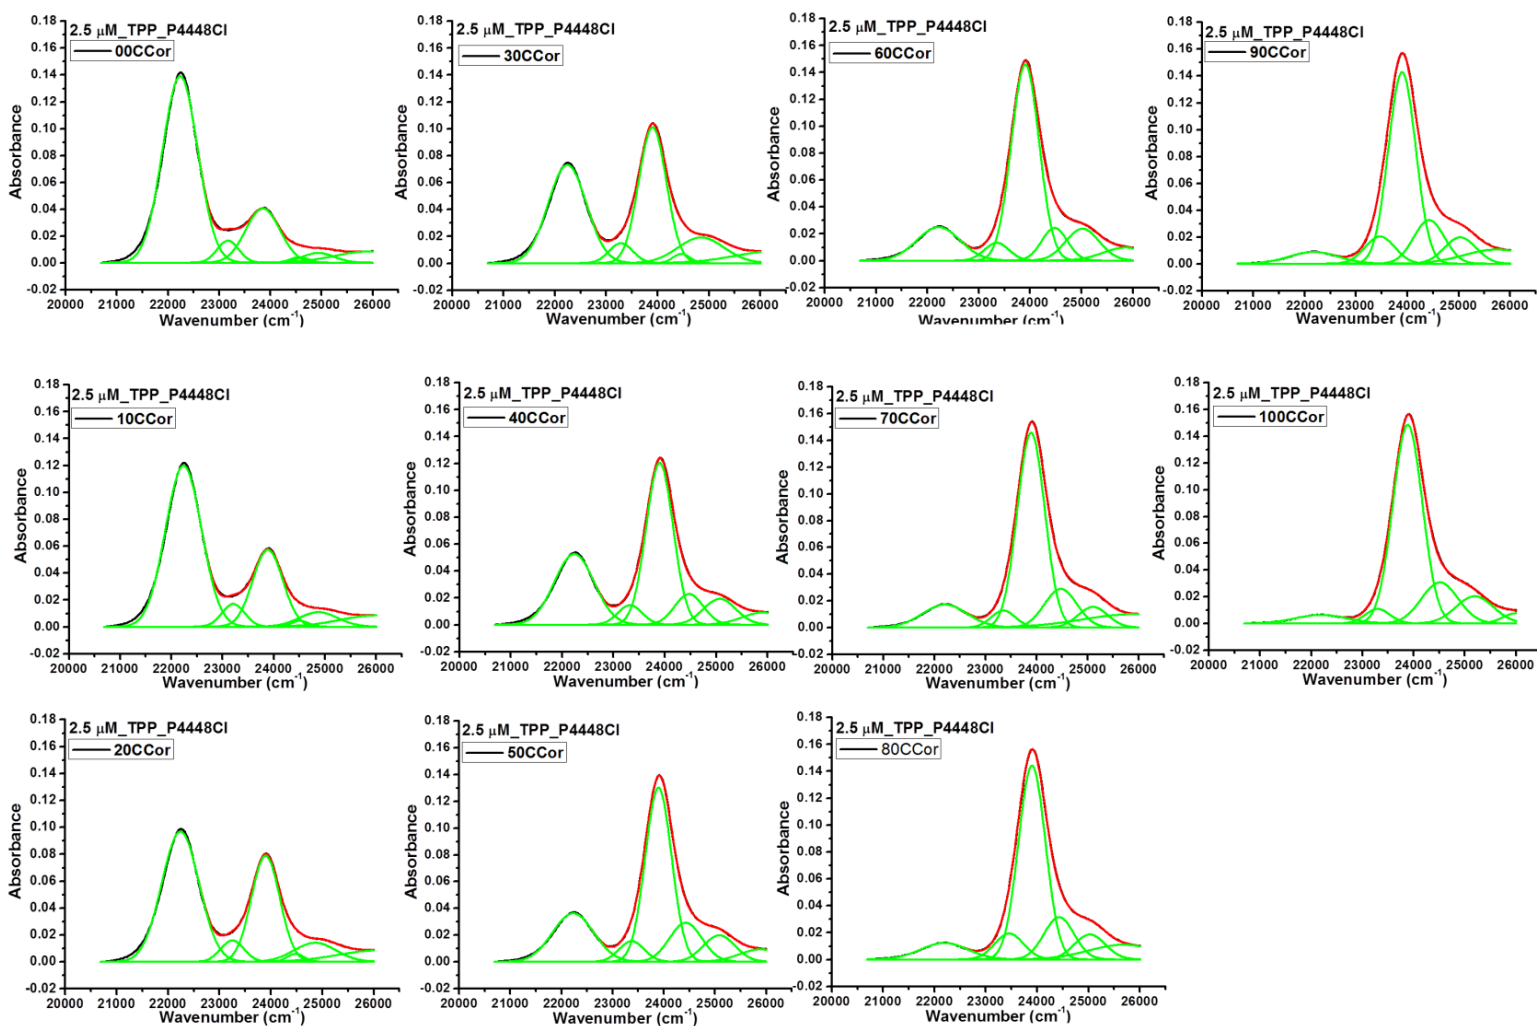

**Figure S2:** Modelling of absorption spectra at ten degree intervals; the Soret region for  $2.5 \mu\text{M}$   $\text{H}_2\text{TPP}$  in the P4448Cl IL. A sixth Gaussian centered at  $24565 \text{ cm}^{-1}$  has been inserted between B(0,0) and B(1,0) to account for hot bands (see text).

**Table S1:** Modelling of Soret absorption spectra (on a  $\text{cm}^{-1}$  scale) by a sum of Gaussian features for  $2.5 \mu\text{M H}_2\text{TPP}$  in P4448Cl IL at ten degree intervals. The  $x_{c_i}$  are the peak wavenumbers,  $w_i$  are the FWHM,  $A_i$  are the areas.

|                     | 0°C        | 10°C       | 20°C       | 30°C        | 40°C       | 50°C       | 60°C        | 70°C        | 80°C         | 90°C        | 100°C       |
|---------------------|------------|------------|------------|-------------|------------|------------|-------------|-------------|--------------|-------------|-------------|
| P                   |            |            |            |             |            |            |             |             |              |             |             |
| $\chi^2/\text{DoF}$ | 2.8411E-6  | 2.2562E-6  | 1.6361E-6  | 1.0503E-6   | 6.4028E-7  | 3.2707E-7  | 1.7992E-7   | 1.1024E-7   | 4.9378E-8    | 3.8556E-8   | 9.3196E-8   |
| $R^2$               | 0.9982     | 0.9981     | 0.9987     | 0.9987      | 0.9993     | 0.9997     | 0.9998      | 0.9999      | 0.9999       | 0.99998     | 0.9999      |
| $y_0$               | 0          | 0          | 0          | 0           | 0          | 0          | 0           | 0           | 0            | 0           | 0           |
| $x_{c1}$            | 22237±1    | 22239±2    | 22241±2    | 22241±2     | 22236±2    | 22228±2    | 22216±2     | 22201±10    | 22186±3      | 22176±4     | 22185±9     |
| $w1$                | 688±3      | 704±3      | 724±4      | 746±4       | 773±4      | 807±5      | 848±5       | 887±13      | 923±7        | 964 ±9      | 1014 ±19    |
| A1                  | 120±0.4    | 106±0.4    | 87.9±0.4   | 68.5±0.3    | 51.0±0.2   | 36.7±0.2   | 26.4±0.1    | 19.16±0.48  | 14.14 ±0.09  | 10.61±0.09  | 8.12±0.13   |
| $x_{c2}$            | 23171±26   | 23212±32   | 23250±33   | 23287±36    | 23323±58   | 23372±71   | 23348±46    | 23349±46    | 23456±78     | 23468±85    | 23295±37    |
| $w2$                | 426±42     | 447±43     | 458±45     | 468±44      | 478±54     | 497±55     | 482±34      | 482 ±52     | 565±46       | 585 ±49     | 489 ±31     |
| A2                  | 8.8 ±1.8   | 9.5 ±1.9   | 9.15 ±2.03 | 8.71 ±1.70  | 8.73 ±2.62 | 9.66 ±3.45 | 8.01 ±2.01  | 7.76 ±3.04  | 13.66 ±4.89  | 14.96 ±5.68 | 6.69 ±1.47  |
| $x_{c3}$            | 23853±28   | 23885±35   | 23898±21   | 23903±17    | 23901±20   | 23896±25   | 23906±5     | 23893 ±10   | 23902±8      | 23900±8     | 23885 ±16   |
| $w3$                | 671 ±60    | 587 ±62    | 552 ±27    | 537 ±24     | 525 ±36    | 514 ±35    | 539±18      | 538 ±18     | 527±20       | 532 ±20     | 576 ±19     |
| A3                  | 34±5.3     | 42±6       | 55±4       | 68±8.3      | 79.2 ±11.7 | 83.8 ±22.6 | 98.7 ±5.3   | 98.2 ±9.3   | 95.2 ±12.9   | 95.2 ±13.7  | 107.2 ±15   |
| $x_{c4}$            | 24561±177  | 24511±59   | 24479±44   | 24462±33    | 24473±111  | 24429±91   | 24476±36    | 24475±50    | 24429 ±40    | 24426±37    | 24514±196   |
| $w4$                | 367±539    | 339±381    | 338±220    | 334±147     | 556±372    | 634 ±587   | 501 ±105    | 642±227     | 588 ±156     | 603±172     | 721±543     |
| A4                  | 1.92±13.64 | 1.91±9.13  | 2.51±6.62  | 2.89±5.18   | 15.9±26.0  | 23.3 ±39.1 | 15.26±10.51 | 23.27±15.59 | 23.18±10.14  | 24.66±12.72 | 27.78±45.98 |
| $x_{c5}$            | 24934±728  | 24876±278  | 24859±167  | 24848±259   | 25069±181  | 25083±215  | 25020±56    | 25105±106   | 25028 ±109   | 25032±109   | 25194±491   |
| $w5$                | 638±2298   | 761±2028   | 826±1798   | 908±1237    | 639±589    | 625 ±460   | 654±250     | 586±103     | 605±186      | 622±188     | 740±551     |
| A5                  | 5.82±60    | 10.33±82   | 14.7±111.1 | 21.8±91.1   | 15.4±29.83 | 15.6±31.0  | 19.44 ±6.27 | 11.39±7.56  | 14.11±18.23  | 15.39±18.74 | 18.91±36.11 |
| $x_{c6}$            | 25950±587  | 26004±814  | 26103±1269 | 26313±4995  | 25903±413  | 25888±380  | 25855±300   | 25927±347   | 25684 ±699   | 25743±551   | 25999±66    |
| $w6$                | 1385±9287  | 1405±11734 | 1609±19975 | 1603±19404  | 803±1279   | 837 ±1084  | 882 ±775    | 2058±2013   | 1368 ±1490   | 1278±1254   | 522±200     |
| A6                  | 14.7±101.5 | 14.9±131.9 | 17.2±226.9 | 18.10±250.7 | 9.1±18.2   | 9.74±15.88 | 10.67±11.96 | 26.05±25.85 | 18.65 ±25.51 | 17.02±20.73 | 5.02±4.13   |

## b. 2.5 $\mu\text{M}$ ZnTPP in IL; the Soret region, Figure S3 and Table S2

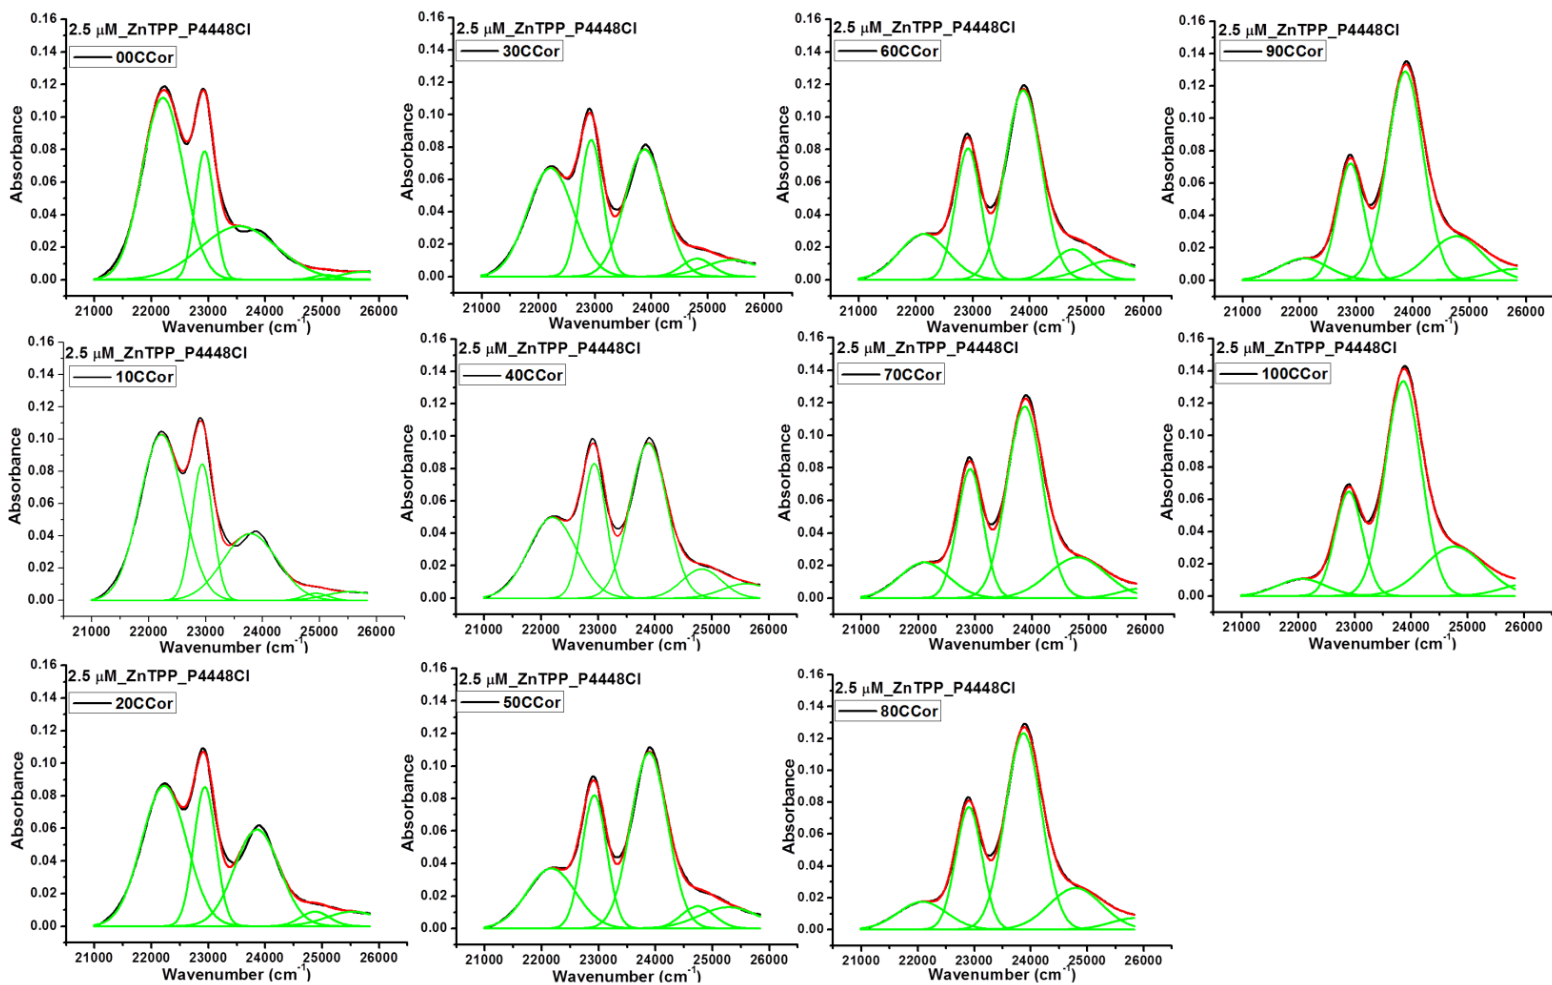

**Figure S3:** Modelling of absorption spectra at ten degree intervals; the Soret region for 2.5  $\mu\text{M}$  ZnTPP in the P4448Cl IL prior to completion of the demetallation (see text).

**Table S2:** Gaussian modelling of Soret absorption bands for 2.5  $\mu\text{M}$  ZnTPP in the P4448Cl IL prior to complete demetallation.

| P                        | 0°C             | 10°C            | 20°C            | 30°C            | 40°C            | 50°C            | 60°C            | 70°C            | 80°C            | 90°C            | 100°C           |
|--------------------------|-----------------|-----------------|-----------------|-----------------|-----------------|-----------------|-----------------|-----------------|-----------------|-----------------|-----------------|
| Chi <sup>2</sup><br>/DoF | 2.4067E-6       | 2.5784E-6       | 2.7048E-6       | 2.6383E-6       | 2.4062E-6       | 2.1439E-6       | 1.9227E-6       | 1.7515E-6       | 1.5312E-6       | 1.2721E-6       | 1.0962E-6       |
| R <sup>2</sup>           | 0.99859         | 0.99813         | 0.99741         | 0.99699         | 0.99728         | 0.99783         | 0.99827         | 0.99856         | 0.99884         | 0.99913         | 0.99933         |
| y0                       | 0               | 0               | 0               | 0               | 0               | 0               | 0               | 0               | 0               | 0               | 0               |
| xc1                      | 22202 $\pm$ 4   | 22221 $\pm$ 3   | 22223 $\pm$ 5   | 22214 $\pm$ 7   | 22197 $\pm$ 9   | 22169 $\pm$ 11  | 22135 $\pm$ 14  | 22100 $\pm$ 16  | 22083 $\pm$ 18  | 22071 $\pm$ 22  | 22057 $\pm$ 26  |
| w1                       | 730 $\pm$ 6     | 762 $\pm$ 6     | 792 $\pm$ 8     | 817 $\pm$ 11    | 842 $\pm$ 15    | 859 $\pm$ 19    | 866 $\pm$ 24    | 861 $\pm$ 28    | 869 $\pm$ 33    | 864 $\pm$ 39    | 853 $\pm$ 46    |
| A1                       | 102 $\pm$ 2     | 98 $\pm$ 1      | 86 $\pm$ 1      | 69 $\pm$ 1      | 53 $\pm$ 1      | 40 $\pm$ 1      | 30 $\pm$ 1      | 24 $\pm$ 1      | 19 $\pm$ 1      | 15 $\pm$ 1      | 11 $\pm$ 1      |
| xc2                      | 22934 $\pm$ 2   | 22936 $\pm$ 2   | 22938 $\pm$ 2   | 22936 $\pm$ 3   | 22931 $\pm$ 3   | 22924 $\pm$ 2   | 22917 $\pm$ 2   | 22911 $\pm$ 2   | 22905 $\pm$ 2   | 22901 $\pm$ 2   | 22897 $\pm$ 2   |
| w2                       | 337 $\pm$ 5     | 366 $\pm$ 5     | 387 $\pm$ 5     | 407 $\pm$ 6     | 422 $\pm$ 6     | 434 $\pm$ 6     | 444 $\pm$ 6     | 456 $\pm$ 5     | 462 $\pm$ 5     | 472 $\pm$ 6     | 485 $\pm$ 6     |
| A2                       | 33 $\pm$ 1      | 39 $\pm$ 1      | 41 $\pm$ 1      | 43 $\pm$ 1      | 44 $\pm$ 1      | 45 $\pm$ 1      | 45 $\pm$ 1      | 45 $\pm$ 1      | 45 $\pm$ 1      | 43 $\pm$ 1      | 39 $\pm$ 1      |
| xc3                      | 23539 $\pm$ 37  | 23782 $\pm$ 10  | 23856 $\pm$ 6   | 23880 $\pm$ 7   | 23884 $\pm$ 8   | 23888 $\pm$ 9   | 23886 $\pm$ 5   | 23872 $\pm$ 9   | 23871 $\pm$ 10  | 23866 $\pm$ 9   | 23859 $\pm$ 7   |
| w3                       | 1355 $\pm$ 71   | 953 $\pm$ 36    | 793 $\pm$ 16    | 703 $\pm$ 12    | 659 $\pm$ 13    | 647 $\pm$ 10    | 643 $\pm$ 9     | 629 $\pm$ 12    | 640 $\pm$ 11    | 640 $\pm$ 11    | 639 $\pm$ 12    |
| A3                       | 56 $\pm$ 3      | 50 $\pm$ 2      | 59 $\pm$ 1      | 69 $\pm$ 2      | 79 $\pm$ 2      | 88 $\pm$ 4      | 94 $\pm$ 2      | 93 $\pm$ 7      | 99 $\pm$ 6      | 103 $\pm$ 6     | 107 $\pm$ 9     |
| xc4                      | 25068 $\pm$ 303 | 24936 $\pm$ 102 | 24873 $\pm$ 93  | 24808 $\pm$ 69  | 24823 $\pm$ 195 | 24740 $\pm$ 33  | 24750 $\pm$ 134 | 24796 $\pm$ 91  | 24794 $\pm$ 167 | 24766 $\pm$ 244 | 24761 $\pm$ 89  |
| w4                       | 442 $\pm$ 448   | 447 $\pm$ 362   | 515 $\pm$ 236   | 544 $\pm$ 256   | 693 $\pm$ 252   | 575 $\pm$ 289   | 663 $\pm$ 245   | 1012 $\pm$ 445  | 936 $\pm$ 438   | 936 $\pm$ 499   | 1082 $\pm$ 480  |
| A4                       | 2 $\pm$ 6       | 3 $\pm$ 7       | 6 $\pm$ 11      | 8 $\pm$ 15      | 16 $\pm$ 15     | 10 $\pm$ 24     | 16 $\pm$ 26     | 32 $\pm$ 17     | 31 $\pm$ 21     | 32 $\pm$ 30     | 42 $\pm$ 23     |
| xc5                      | 25710 $\pm$ 225 | 25546 $\pm$ 503 | 25534 $\pm$ 427 | 25425 $\pm$ 643 | 25600 $\pm$ 523 | 25282 $\pm$ 857 | 25407 $\pm$ 851 | 25946 $\pm$ 475 | 25841 $\pm$ 412 | 25806 $\pm$ 822 | 26059 $\pm$ 846 |
| w5                       | 737 $\pm$ 1653  | 882 $\pm$ 1478  | 922 $\pm$ 1144  | 977 $\pm$ 1149  | 825 $\pm$ 1028  | 1033 $\pm$ 1066 | 964 $\pm$ 1119  | 810 $\pm$ 1907  | 864 $\pm$ 1743  | 940 $\pm$ 2436  | 924 $\pm$ 2648  |
| A5                       | 5 $\pm$ 10      | 6 $\pm$ 11      | 10 $\pm$ 15     | 13 $\pm$ 19     | 9 $\pm$ 17      | 17 $\pm$ 29     | 14 $\pm$ 28     | 6 $\pm$ 22      | 8 $\pm$ 24      | 8 $\pm$ 32      | 9 $\pm$ 38      |

4. Figure S4: Van't Hoff plot for 25 $\mu$ M porphyrin in P4448Cl ionic liquid

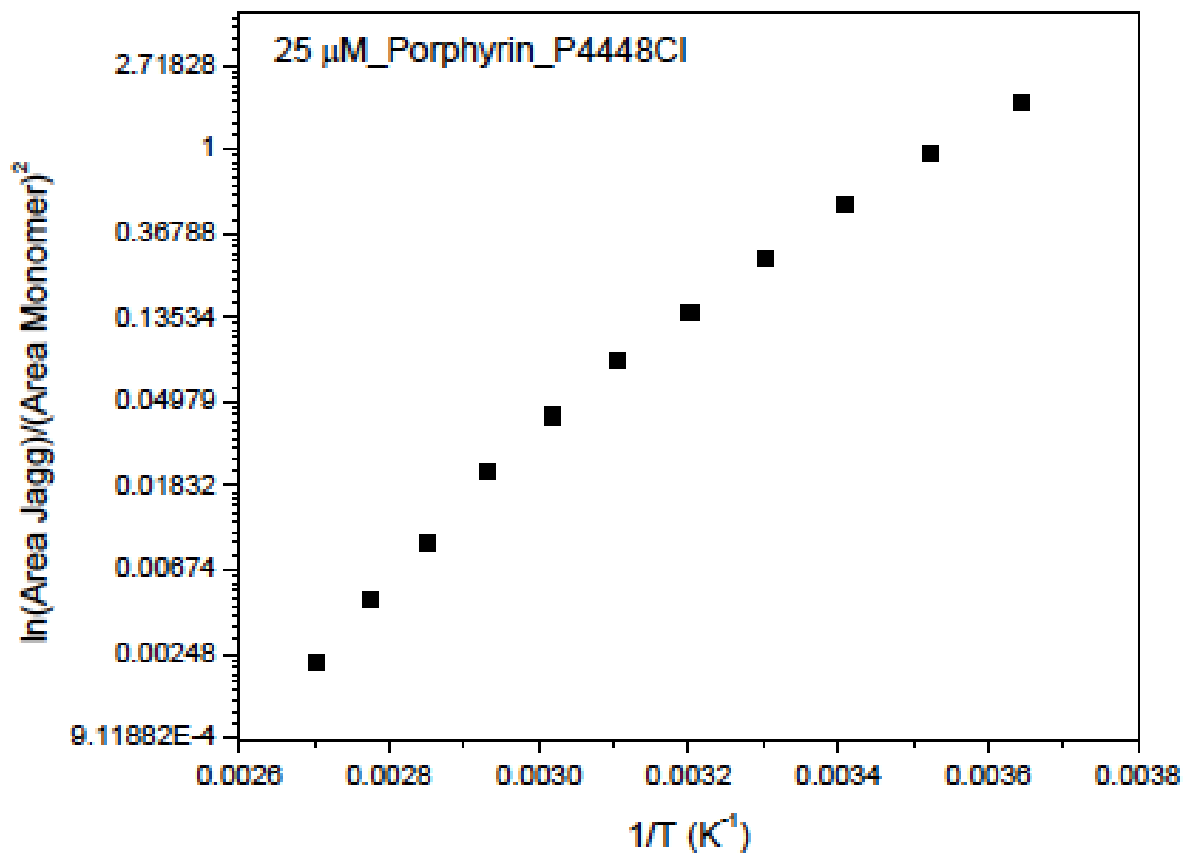



**5. Modelling of Q band absorption spectra (on a  $\text{cm}^{-1}$  scale) by a sum of Gaussian features;  $x_{c_i}$  are the peak wavenumbers,  $w_i$  are the FWHM,  $A_i$  are the areas**

**2.5  $\mu\text{M}$   $\text{H}_2\text{TPP}$  in IL; the Q band region, Figure S5 and Table S3**

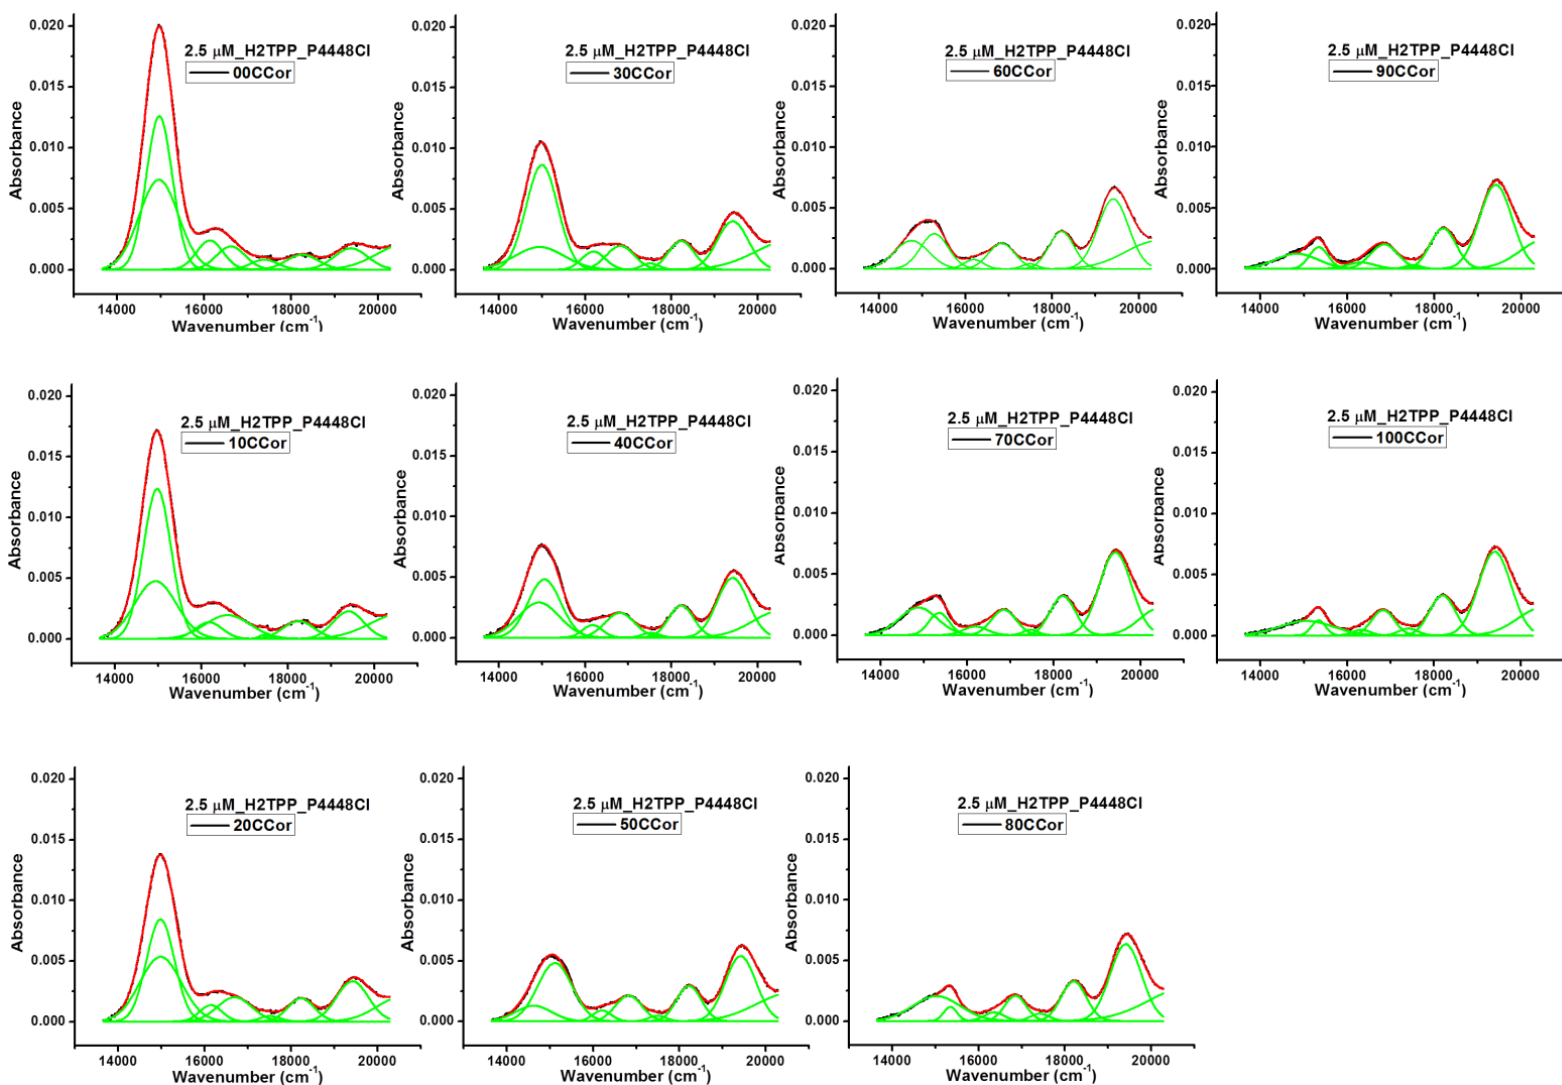

**Figure S5:** Modelling of absorption spectra at ten degree intervals; the Q band region for 2.5  $\mu\text{M}$   $\text{H}_2\text{TPP}$  in the P4448Cl IL.

**Table S3:** Modelling of absorption spectra (on a  $\text{cm}^{-1}$  scale) in the Q band region at ten degree intervals by a sum of Gaussian features for  $2.5 \mu\text{M}$   $\text{H}_2\text{TPP}$  in P4448Cl IL. The  $x_{c_i}$  are the peak wavenumbers,  $w_i$  are the FWHM,  $A_i$  are the areas.

| P                         | 0°C        | 10°C       | 20°C      | 30°C      | 40°C      | 50°C      | 60°C      | 70°C      | 80°C      | 90°C      | 100°C     |
|---------------------------|------------|------------|-----------|-----------|-----------|-----------|-----------|-----------|-----------|-----------|-----------|
| Chi <sup>2</sup> /<br>DoF | 4.5647E-9  | 4.3258E-9  | 4.5787E-9 | 5.4898E-9 | 7.1832E-9 | 8.8878E-9 | 8.2527E-9 | 5.908E-9  | 3.7977E-9 | 7.2827E-9 | 3.8049E-9 |
| R <sup>2</sup>            | 0.99985    | 0.9998     | 0.99967   | 0.99929   | 0.99835   | 0.99693   | 0.99671   | 0.99768   | 0.99857   | 0.99743   | 0.99871   |
| y0                        | 0          | 0          | 0         | 0         | 0         | 0         | 0         | 0         | 0         | 0         | 0         |
| xc1                       | 14967±3    | 14978±9    | 14980±2   | 15000±5   | 14926±123 | 14621±536 | 14753±81  | 14873±33  | 15026±9   | 14831±48  | 15.57±14  |
| w1                        | 604±9      | 642±14     | 645±12    | 733±15    | 950±43    | 835±250   | 791±57    | 876±31    | 1107±10   | 986±53    | 1245±17   |
| A1                        | 9.5±0.8    | 9.9±1.4    | 6.8±1.2   | 7.9±0.7   | 3.4±2.9   | 1.4±2.7   | 2.3±0.5   | 2.5±0.2   | 2.9±0.0   | 1.5±0.1   | 1.9±0.0   |
| xc2                       | 14957±12   | 14937±96   | 14982±6   | 14947±56  | 15053±16  | 15116±120 | 15281±33  | 15352±5   | 15348±3   | 15342±5   | 15339±3   |
| w2                        | 902±14     | 970±36     | 960±24    | 1158±60   | 759±65    | 799±63    | 644±33    | 476±22    | 312±9     | 438±18    | 331±8     |
| A2                        | 8.3±0.8    | 5.8±1.9    | 6±0.7     | 2.7±0.8   | 4.6±2.9   | 4.8±2.7   | 2.3±0.5   | 1.1±0.2   | 0.5±0.0   | 0.9±0.1   | 0.5±0.0   |
| xc3                       | 16130±272  | 16168±31   | 16143±44  | 16194±52  | 16168±27  | 16206±33  | 16190±31  | 16190±64  | 16361±107 | 16311±616 | 16321±90  |
| w3                        | 613±170    | 633±247    | 520±78    | 551±68    | 461±50    | 438±48    | 447±51    | 557±92    | 475±95    | 646±437   | 422±88    |
| A3                        | 1.8±3.0    | 1.1±2.7    | 0.9±0.7   | 1.0±0.4   | 0.6±0.2   | 0.5±0.1   | 0.4±0.1   | 0.5±0.1   | 0.4±0.2   | 0.4±1.0   | 0.3±0.2   |
| xc4                       | 16614±438  | 16603±659  | 16692±126 | 16816±50  | 16802±21  | 16823±14  | 16835±12  | 16848±19  | 16854±27  | 16844±149 | 16825±16  |
| w4                        | 665±533    | 1058±624   | 798±247   | 656±116   | 685±77    | 616±68    | 610±47    | 574±47    | 501±81    | 634±155   | 522±77    |
| A4                        | 1.6±3.4    | 2.6±3.4    | 2.0±0.9   | 1.6±0.4   | 1.8±0.2   | 1.6±0.2   | 1.6±0.1   | 1.5±0.2   | 1.3±0.3   | 1.6±1.0   | 1.4±0.3   |
| xc5                       | 17381±149  | 17448±12.8 | 17507±52  | 17503±36  | 17517±39  | 17489±44  | 17489±30  | 17459±24  | 17417±59  | 17502±45  | 17405±65  |
| w5                        | 620±241    | 254±43     | 461±111   | 415±76    | 400±90    | 410±93    | 356±65    | 344±46    | 438±82    | 359±92    | 449±87    |
| A5                        | 0.6±0.6    | 0.1±0.04   | 0.3±0.2   | 0.3±0.1   | 0.2±0.1   | 0.2±0.1   | 0.2±0.1   | 0.2±0.0   | 0.3±0.1   | 0.1±0.1   | 0.3±0.1   |
| xc6                       | 18259±30   | 732±85     | 18231±7   | 18226±13  | 18229±12  | 18223±10  | 18216±9   | 18210±3   | 18205±6   | 18200±3   | 18195±3   |
| w6                        | 740±100    | 732±85     | 618±22    | 599±34    | 582±27    | 575±      | 580±20    | 582±8     | 584±17    | 597±10    | 598±8     |
| A6                        | 1.1±0.2    | 1.3±0.4    | 1.5±0.1   | 1.8±0.2   | 1.9±0.2   | 2.1±0.2   | 2.2±0.2   | 2.3±0.0   | 2.4±0.1   | 2.5±0.0   | 2.5±0.0   |
| xc7                       | 19375±115  | 19402±43   | 19421±49  | 19419±7   | 19422±35  | 19418±7   | 19411±6   | 19426±20  | 19411±4   | 19409±28  | 19400±21  |
| w7                        | 780±193    | 719±203    | 740±51    | 723±60    | 721±107   | 715±45    | 709±41    | 741±18    | 732±26    | 748±29    | 750±23    |
| A7                        | 1.7±1.9    | 2.0±2.8    | 3.1±1.0   | 3.6±1.1   | 4.5±3.2   | 4.8±1.1   | 5.1±1.1   | 6.2±0.5   | 5.8±0.7   | 6.5±1.2   | 6.5±1.0   |
| xc8                       | 20664±1239 | 20666±185  | 20569±594 | 20861±773 | 20578±106 | 20609±305 | 20468±211 | 20445±160 | 20878±405 | 20556±560 | 20519±351 |
| w8                        | 1351±2660  | 1496±4380  | 1165±1380 | 1768±1629 | 1368±3483 | 1648±940  | 1529±729  | 914±442   | 1863±853  | 1172±1355 | 1181±1031 |
| A8                        | 3.6±9.3    | 4.0±14.5   | 2.9±4.5   | 5.7±6.5   | 3.9±11.5  | 4.9±2.9   | 4.7±2.2   | 2.5±1.6   | 6.5±3.6   | 3.6±5.2   | 3.4±3.6   |

## 6. Absorption spectra of the purified ionic liquid as a function of temperature

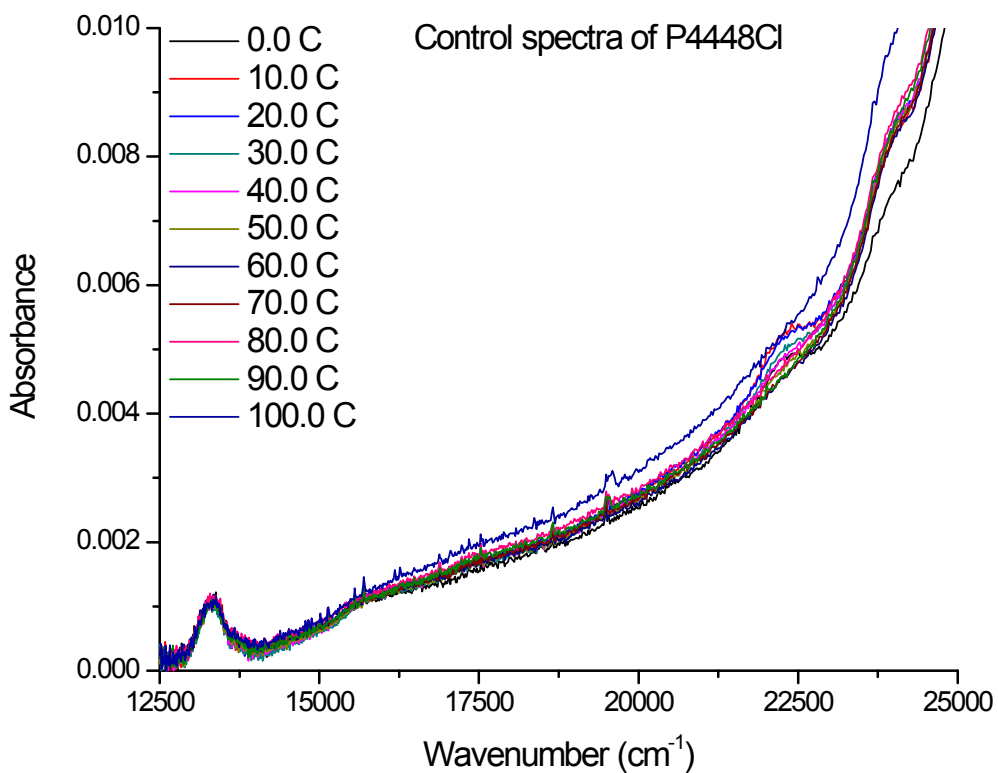

**Figure S6:** Absorption spectrum of control P4448Cl ionic liquid. Measurements are performed under the same experimental conditions as reported for samples. The absorption band at 13300 cm<sup>-1</sup> is the  $\Delta v = 5$  C-H stretching overtone of the alkyl substituents of the IL.<sup>2</sup>

2. Henry, B. R.; Greenlay, W. R. A., *J. Chem. Phys.* **1980**, 72, 5516-5524.

**7. Fluorescence decay profiles:** 2.5  $\mu\text{M}$   $\text{H}_2\text{TPP}$  in undegassed P4448Cl ionic liquid at room temperature.  $\text{Log}_{10}(\text{total counts})$  vs. time in ns. The solid line is the multiexponential fit. The bottom panel is the distribution of weighted residuals. The green curve is the instrument response function. The full set of data extracted from these decays is in Table 1 of the main text.

**Figure S7A: Excitation in Soret J aggregate band at 458 nm, observation at 693 nm**

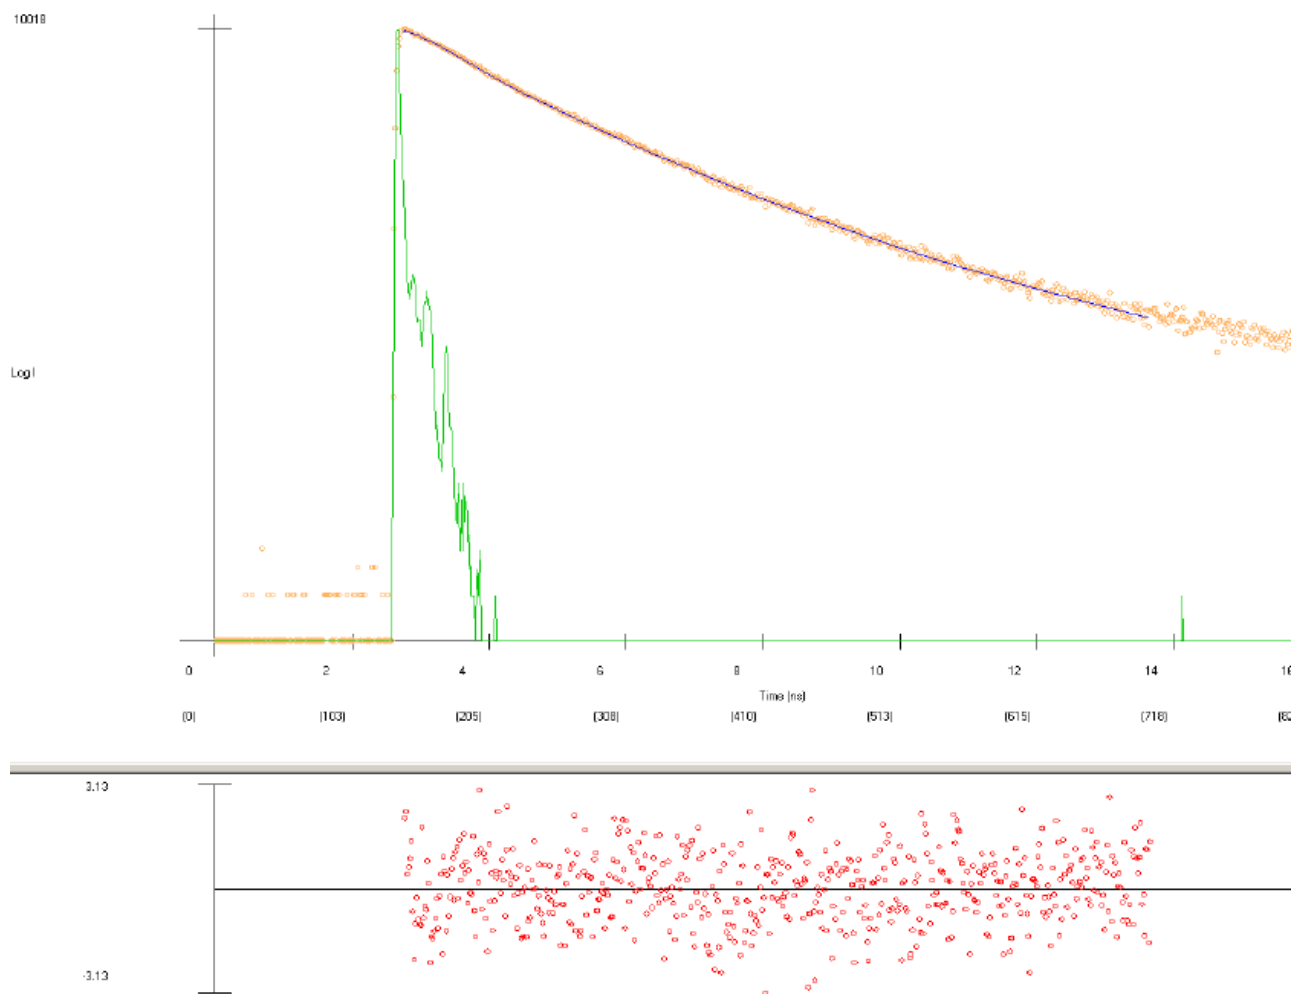

**Figure S7B: Excitation in Soret monomer band at 414 nm, observation at 716 nm**

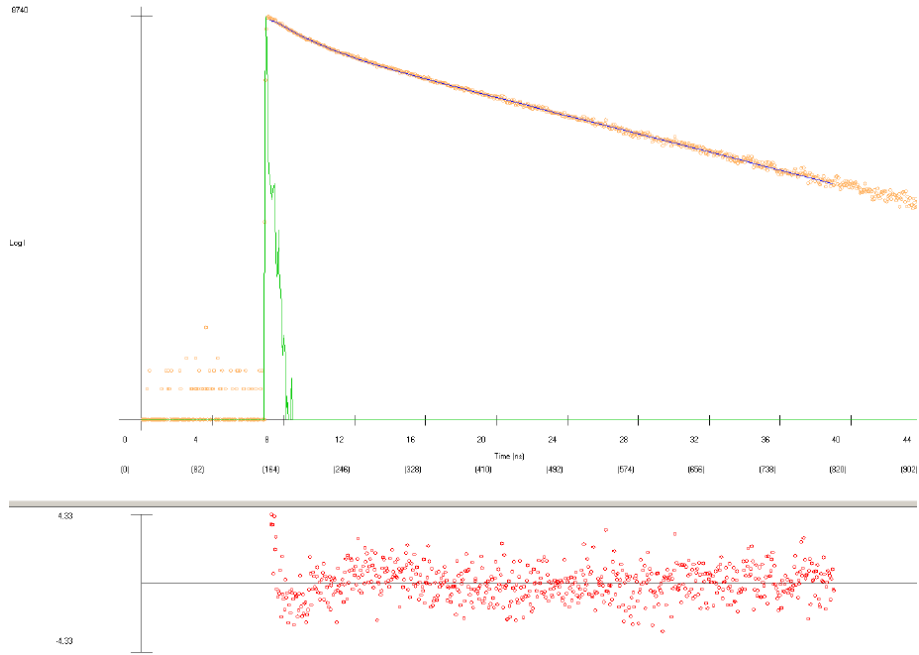

**Figure S7C: Excitation in the Soret monomer/J dimer overlap region at 436 nm, observation at 693 nm**

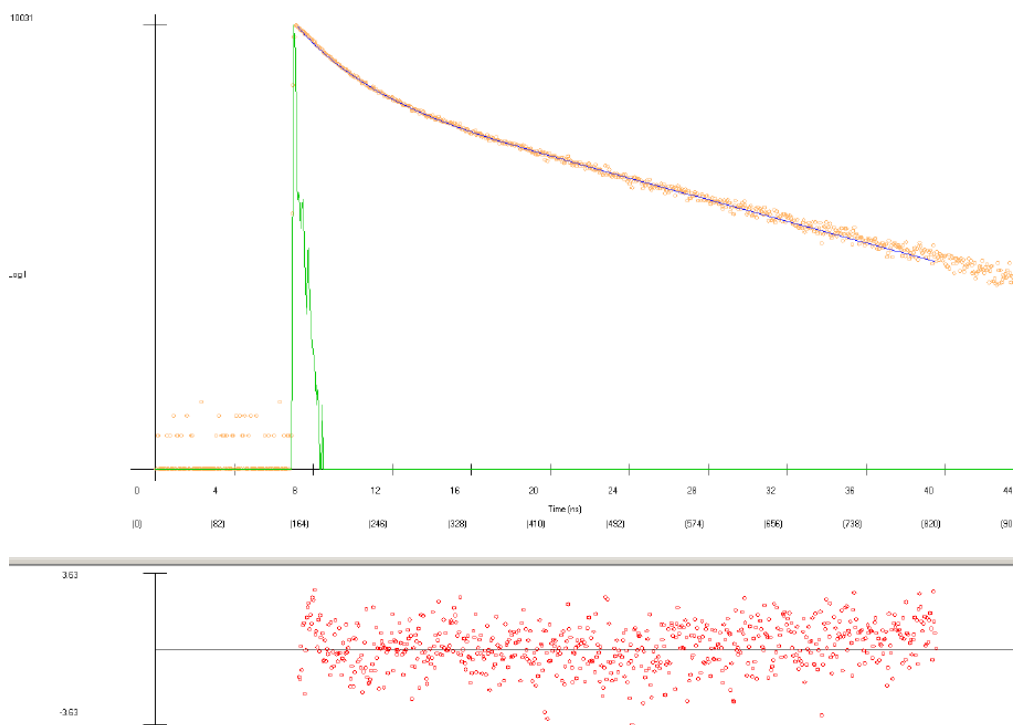

Supplement: c4cp04257c1.pdf [file c4cp04257c1.pdf]
